# Supplementary material for: Unexpected phase separation in Li1−xNi0.5Mn1.5O4 within a porous composite electrode
Source: Royal Society of Chemistry journal article supplement (doi:10.1039/c8cc01866a), 2018-01-01
Supplement: c8cc01866a1.pdf [file c8cc01866a1.pdf]

Supplementary Information

Unexpected phase separation in  $\text{Li}_{1-x}\text{Ni}_{0.5}\text{Mn}_{1.5}\text{O}_4$  within a porous composite electrode

Mi Lu<sup>a</sup>, Jian Wang<sup>b\*</sup>, Haitao Fang<sup>c</sup>, Yongfeng Hu<sup>b</sup>, Jigang Zhou<sup>b\*</sup>

Canadian Light Source Inc., Saskatoon, Canada. Fax: 1-306-6573535; Tel: 1-306-657-3587; E-mail:

[jigang.zhou@lightsource.ca](mailto:jigang.zhou@lightsource.ca);

- <sup>a</sup> Key laboratory of functional materials and applications of Fujian Province, School of materials science and engineering, Xiamen University of technology, Xiamen, China, 361024  
<sup>b</sup> Canadian Light Source Inc., Saskatoon, SK S7N 2V3, Canada. Fax: 1-306-6573535; Tel: 1-306-657-3587; E-mails: [jigang.zhou@lightsource.ca](mailto:jigang.zhou@lightsource.ca); [jian.wang@lightsource.ca](mailto:jian.wang@lightsource.ca)  
<sup>c</sup> School of Materials Engineering, Harbin Institute of Technology, China

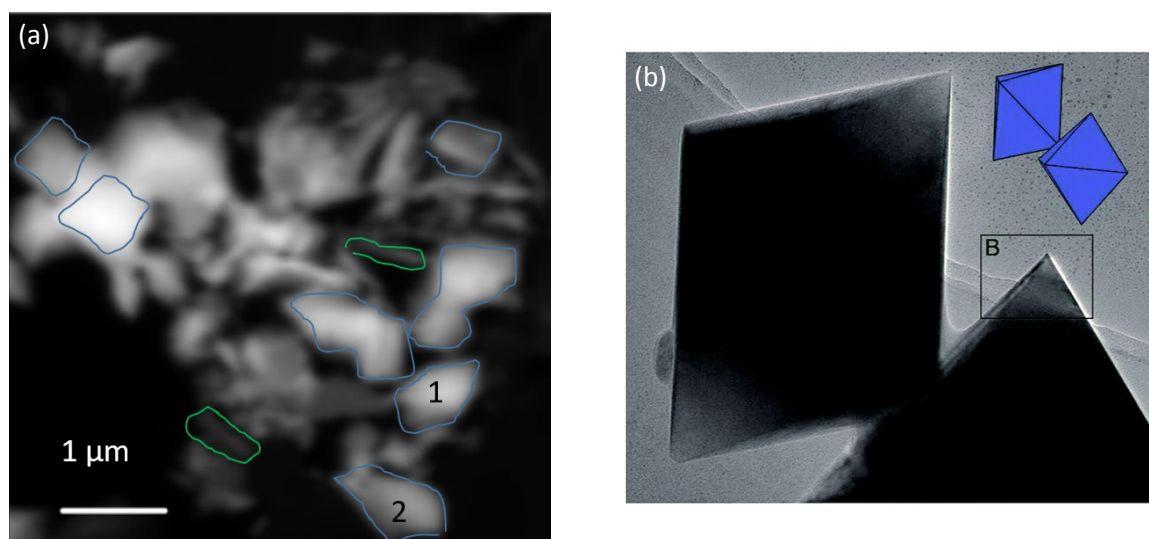

Support Fig. S1 (a) octahedral shaped particles are highlighted by blue boxes and plate-like particles are highlighted by green boxes (left panel). (b) TEM image of octahedral shaped LNMO (right panel), cited from J. Mater. Chem. A, 2014, 2, 11987.

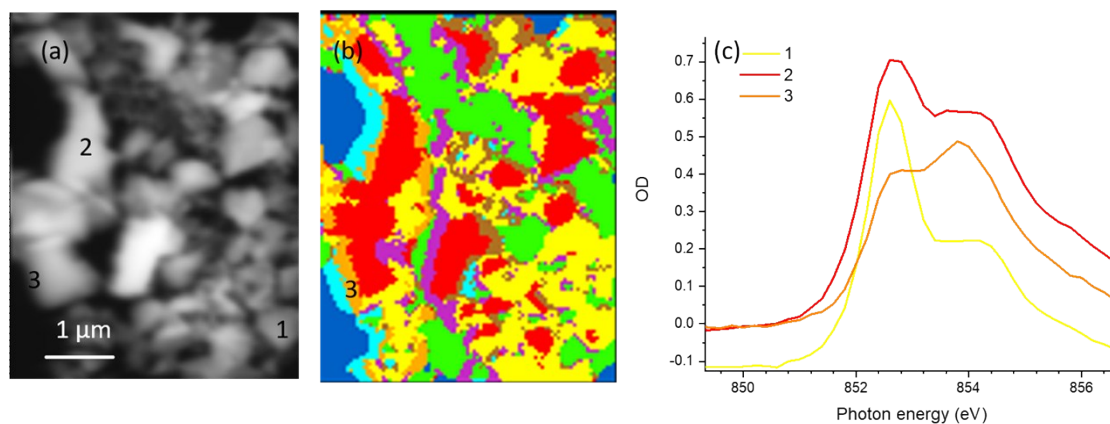

Support Fig. S2 (a) Morphology mapping of the self-discharged 60% delithiated LNMO thin-section, (b) PCA mapping of Ni oxidation state in this region, and (c) representative Ni L-edge XANES of major components in (b).
